# Supplementary material for: Calcified Neurocysticercosis: Demographic, Clinical, and Radiological Characteristics of a Large Hospital-Based Patient Cohort
Source: MDPI journal article supplement (doi:10.3390/pathogens13010026), 2023-12-27
Supplement: s1 [file s1]

**Supplementary Table S1.** Demographic, clinical, and radiological profiles of patients with calcified NCC, with and without a previous diagnosis of viable infection

| Characteristics                                            | Previous diagnosis of viable infection |               | <i>P</i> |
|------------------------------------------------------------|----------------------------------------|---------------|----------|
|                                                            | No (n = 242)                           | Yes (n = 282) |          |
| <b><i>Age at enrollment (years)</i></b>                    |                                        |               |          |
| Mean ± SD                                                  | 41.5 ± 16.4                            | 39.2 ± 14.0   | 0.091    |
| <b><i>Sex</i></b>                                          |                                        |               |          |
| Female                                                     | 154 (63.6)                             | 141 (50.0)    | 0.002    |
| Male                                                       | 88 (36.4)                              | 141 (50.0)    |          |
| <b><i>Age at start of symptoms (years)</i></b>             |                                        |               |          |
| Mean ± SD                                                  | 30.7 ± 17.2                            | 27.7 ± 14.9   | 0.038    |
| <b><i>Type of first symptom</i></b>                        |                                        |               |          |
| No symptoms                                                | 2 (0.4)                                | 0 (0.0)       | 0.050    |
| Headache                                                   | 135 (55.8)                             | 138 (48.9)    |          |
| Seizures                                                   | 25 (10.3)                              | 47 (16.7)     |          |
| Headache and seizures                                      | 77 (31.8)                              | 97 (34.4)     |          |
| <b><i>Previous seizures</i></b>                            |                                        |               |          |
| No                                                         | 82 (33.9)                              | 27 (9.6)      | < 0.001  |
| Yes                                                        | 160 (66.1)                             | 255 (90.4)    |          |
| <b><i>Years since first seizure</i></b>                    |                                        |               |          |
| Median [IQR]                                               | 3 [1-11]                               | 6 [2-14]      | 0.001    |
| <b><i>Number of previous seizures</i></b>                  |                                        |               |          |
| Median [IQR]                                               | 7 [3-27]                               | 8 [3-25]      | 0.275    |
| <b><i>Seizure semiology</i></b>                            |                                        |               |          |
| Pure focal seizures                                        | 38 (23.8)                              | 44 (17.3)     | 0.106    |
| Focal to bilateral tonic-clonic seizures                   | 122 (76.2)                             | 211 (82.7)    |          |
| <b><i>History of status epilepticus</i></b>                |                                        |               |          |
| No                                                         | 146 (91.8)                             | 227 (89.4)    | 0.412    |
| Yes                                                        | 13 (8.2)                               | 27 (10.6)     |          |
| <b><i>ASM</i></b>                                          |                                        |               |          |
| No                                                         | 21 (13.2)                              | 26 (10.6)     | 0.418    |
| Yes                                                        | 138 (86.8)                             | 220 (89.4)    |          |
| <b><i>Seizure-free time before enrollment (months)</i></b> |                                        |               |          |
| Median [IQR]                                               | 2 [0-12]                               | 12 [2-34]     | < 0.001  |
| <b><i>Previous neurosurgery</i></b>                        |                                        |               |          |
| No                                                         | 235 (97.1)                             | 243 (86.2)    | < 0.001  |
| Yes                                                        | 7 (2.9)                                | 39 (13.8)     |          |
| <b><i>Previous diagnosis of taeniasis</i></b>              |                                        |               |          |
| No                                                         | 207 (91.2)                             | 221 (81.3)    | 0.002    |
| Yes                                                        | 20 (8.8)                               | 51 (18.7)     |          |

|                                                         |            |            |         |
|---------------------------------------------------------|------------|------------|---------|
| <b><i>Family history of seizures</i></b>                |            |            |         |
| No                                                      | 166 (89.4) | 203 (74.6) | 0.703   |
| Yes                                                     | 61 (10.6)  | 69 (25.4)  |         |
| <b><i>Family history of NCC</i></b>                     |            |            |         |
| No                                                      | 203 (89.4) | 242 (89.0) | 0.870   |
| Yes                                                     | 24 (10.6)  | 30 (11.0)  |         |
| <b><i>Baseline EEG results</i></b>                      |            |            |         |
| Normal                                                  | 221 (94.8) | 271 (98.2) | 0.037   |
| Abnormal                                                | 12 (5.2)   | 5 (1.8)    |         |
| <b><i>EITB results (number of antibody bands)</i></b>   |            |            |         |
| Median [IQR]                                            | 1 [0-3]    | 3 [2-5]    | < 0.001 |
| <b><i>Number of calcifications on brain CT scan</i></b> |            |            |         |
| Median [IQR]                                            | 2 [1-5]    | 3 [1-9]    | < 0.001 |
| 1                                                       | 98 (40.5)  | 78 (27.7)  | < 0.001 |
| 2 to 10                                                 | 119 (49.2) | 143 (50.7) |         |
| +10                                                     | 25 (10.3)  | 61 (21.6)  |         |

---

Abbreviations: NCC (neurocysticercosis); SD (standard deviation); IQR (interquartile range); EEG (Electroencephalogram); EITB (Enzyme-linked Immuno-electrotransfer Blot); ASM (Anti-seizure medication); CT (computed tomography)

**Supplementary Table S2.** Clinical profiles of patients with calcified NCC, with single and multiple lesions.

| Characteristics                                            | Number of calcified lesions |                               | <i>P</i> |
|------------------------------------------------------------|-----------------------------|-------------------------------|----------|
|                                                            | Single lesions<br>(n = 176) | Multiple<br>lesions (n = 348) |          |
| <b><i>Age at start of symptoms (years)</i></b>             |                             |                               |          |
| Mean ± SD                                                  | 28.7 ± 13.9                 | 29.3 ± 17.1                   | 0.651    |
| <b><i>Type of first symptom</i></b>                        |                             |                               |          |
| No symptoms                                                | 0 (0.0)                     | 1 (0.3)                       | 0.695    |
| Headache                                                   | 95 (54.0)                   | 178 (51.2)                    |          |
| Seizures                                                   | 61 (34.7)                   | 113 (32.5)                    |          |
| Headache and seizures                                      | 19 (10.8)                   | 53 (15.2)                     |          |
| <b><i>Previous seizures</i></b>                            |                             |                               |          |
| No                                                         | 47 (26.7)                   | 62 (17.8)                     | 0.018    |
| Yes                                                        | 129 (73.3)                  | 286 (82.2)                    |          |
| <b><i>Years since first seizure</i></b>                    |                             |                               |          |
| Median [IQR]                                               | 3 [1-10]                    | 5 [2-14]                      | 0.047    |
| <b><i>Number of previous seizures</i></b>                  |                             |                               |          |
| Median [IQR]                                               | 6 [3-29]                    | 8 [3-32]                      | 0.370    |
| <b><i>Seizure semiology</i></b>                            |                             |                               |          |
| Pure focal seizures                                        | 30 (23.3)                   | 52 (18.2)                     | 0.230    |
| Focal to bilateral tonic-clonic seizures                   | 99 (76.7)                   | 234 (81.8)                    |          |
| <b><i>History of status epilepticus</i></b>                |                             |                               |          |
| No                                                         | 116 (89.9)                  | 257 (90.5)                    | 0.856    |
| Yes                                                        | 13 (10.1)                   | 27 (9.5)                      |          |
| <b><i>ASM</i></b>                                          |                             |                               |          |
| No                                                         | 17 (13.2)                   | 30 (10.9)                     | 0.499    |
| Yes                                                        | 112 (86.8)                  | 246 (89.1)                    |          |
| <b><i>Seizure-free time before enrollment (months)</i></b> |                             |                               |          |
| Median [IQR]                                               | 4 [0-20]                    | 7 [1-31]                      | 0.071    |

Abbreviations: NCC (neurocysticercosis); SD (standard deviation); IQR (interquartile range); EEG (Electroencephalogram); EITB (Enzyme-linked Immuno-electrotransfer Blot); ASM (Anti-seizure medication); CT (computed tomography)

**Supplementary Table S3.** Detailed description of EEG in patients with calcified NCC and abnormal EEG results at baseline (n = 17)

| <b>Id</b> | <b>Description of EEG results</b>                                                                            |
|-----------|--------------------------------------------------------------------------------------------------------------|
| 1         | Generalized cortical slowing with paroxysmal discharges                                                      |
| 2         | Focalized cortical slowing in the right hemisphere with paroxysmal discharges                                |
| 3         | Cortical dysfunction in the right frontal lobe                                                               |
| 4         | Generalized cortical slowing with interictal epileptic discharges                                            |
| 5         | Generalized cortical slowing with paroxysmal discharges                                                      |
| 6         | Focalized cortical slowing in the left frontal lobe with paroxysmal discharges                               |
| 7         | Focalized cortical slowing in the left hemisphere with paroxysmal discharges                                 |
| 8         | Focalized cortical slowing in the right hemisphere with predominance of the frontal lobe                     |
| 9         | Generalized cortical slowing with predominance of the right hemisphere and with paroxysmal discharges        |
| 10        | Focalized cortical-subcortical slowing in the left hemisphere with non-paroxysmal discharges                 |
| 11        | Generalized cortical-subcortical slowing with non-paroxysmal discharges                                      |
| 12        | Intermittent cortical-subcortical slowing in the right hemisphere                                            |
| 13        | Intermittent diffuse cortical-subcortical slowing with non-paroxysmal discharges                             |
| 14        | Diffuse cortical-subcortical slowing with non-paroxysmal discharges                                          |
| 15        | Intermittent cortical-subcortical slowing with non-paroxysmal discharges                                     |
| 16        | Intermittent generalized bilateral theta activity                                                            |
| 17        | Intermittent generalized theta activity with bifrontal sharp waves suggesting abnormal epileptiform activity |

Abbreviations: NCC (neurocysticercosis); EEG (electroencephalogram)
